# Supplementary material
Source: Royal Society of Chemistry journal article supplement (doi:10.1039/d6bm00302h)
Supplement: d6bm00302h1.pdf [file d6bm00302h1.pdf]

## Supplementary Information

### **Zinc-chelated cuttlefish ink melanin nanoparticles complexed sprayable chitosan-based hydrogel to promote infected wounds healing**

Ruimin Zhan<sup>a,1</sup>, Lu Liu<sup>a,1</sup>, Yan Shi<sup>a</sup>, Jinrui Li<sup>a</sup>, Dandan Jing<sup>a</sup>, Mengyang Mao<sup>a</sup>, Qian Yu<sup>a</sup>, Siyi Tong<sup>a</sup>, Hu Hou<sup>d</sup>, Hui-Min David Wang<sup>c</sup>, Zhiguo Wang<sup>b\*</sup>, Ming Kong<sup>a\*</sup>

<sup>a</sup> *College of Marine Life Science, Ocean University of China, Qingdao 266003, China*

<sup>b</sup> *Department of Burn and Plastic Surgery, the Affiliated Hospital of Qingdao University, Qingdao University, Qingdao, 266003, China*

<sup>c</sup> *Graduate Institute of Biomedical Engineering, National Chung Hsing University, Taichung City, 402, Taiwan*

<sup>d</sup> *College of Food Science and Engineering, Ocean University of China, Qingdao 266404, China*

<sup>1</sup> these authors contributed equally in this work

\* Corresponding author:

Dr. Zhiguo Wang (E-mail: qyfywzg@126.com)

## 1. Results

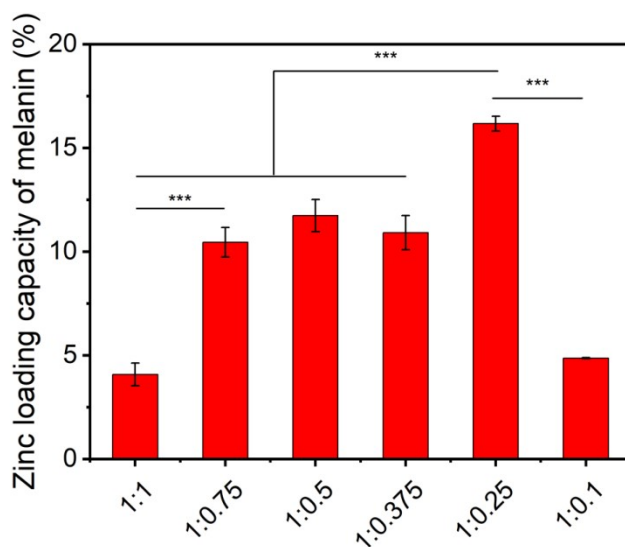

Fig. S1. Zinc ion loading rate of Me@Zn<sup>2+</sup> with different concentration ratios of melanin to zinc ions.

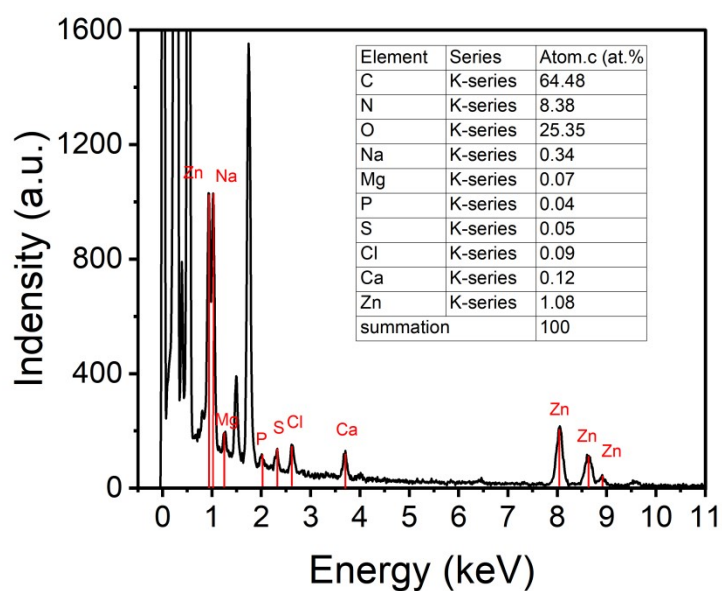

Fig. S2. Surface total spectrum and elemental ratio of EDS.

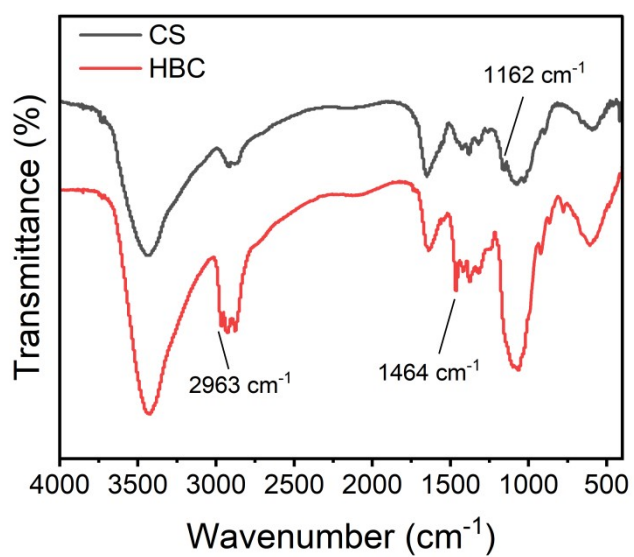

Fig. S3. FT-IR spectra of CS and HBC.

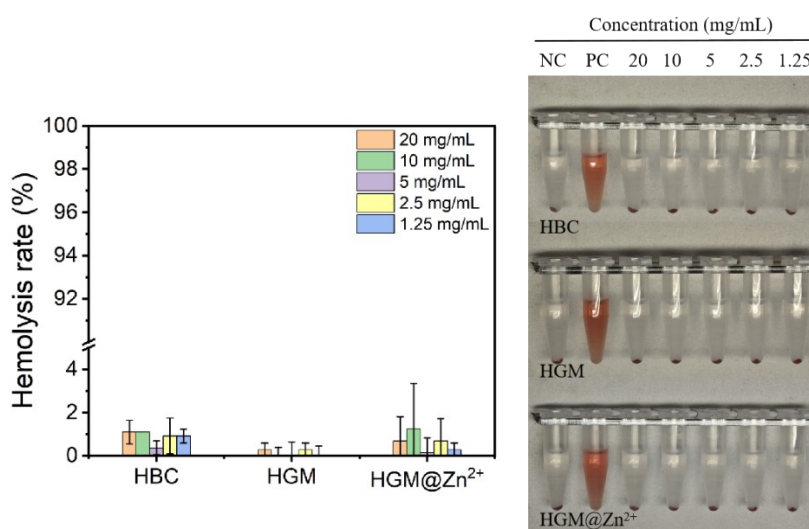

Fig. S4. Blood compatibility of extracts from different materials.

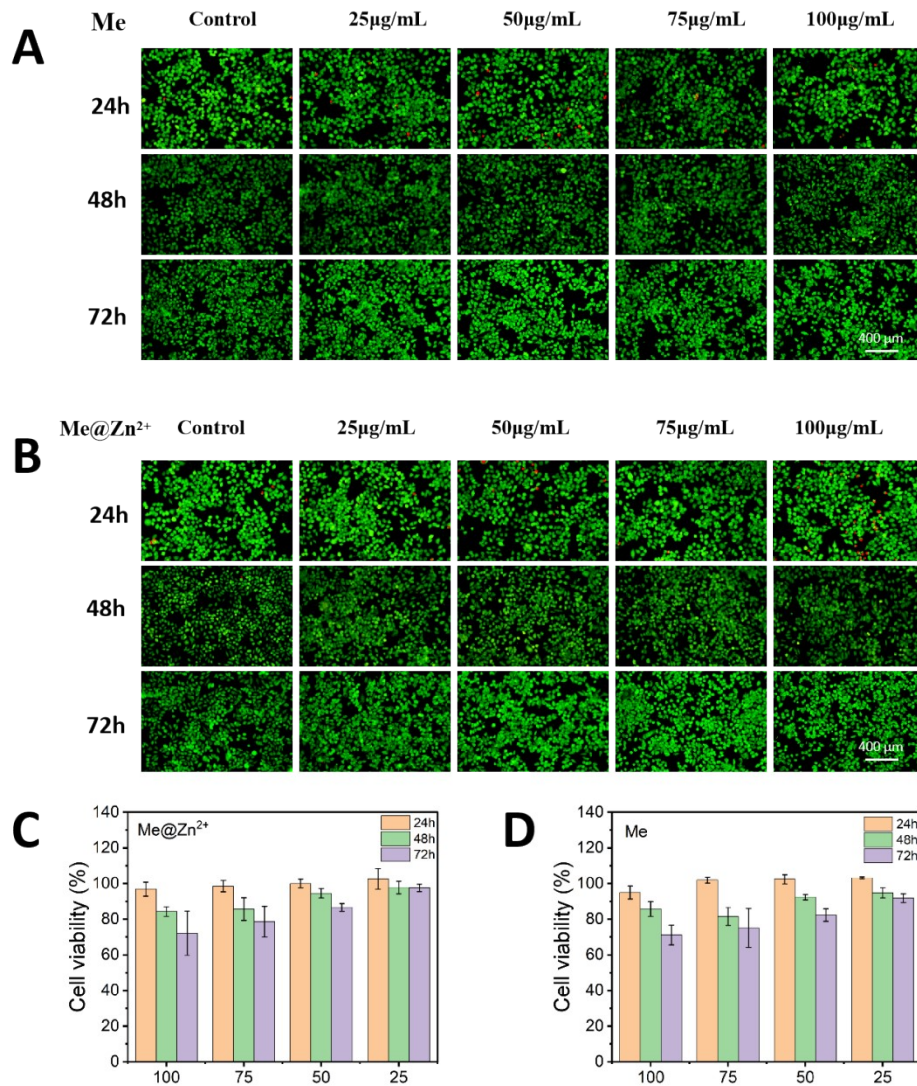

Fig. S5. (A) Live/dead staining of L929 cells co-cultured with Me for 24, 48, and 72 hours. (B) Live/dead staining of L929 cells co-cultured with Me@Zn<sup>2+</sup> for 24, 48, and 72 hours. (C) Cell viability of L929 cells co-cultured with Me detected by the CCK-8 assay. (D) Cell viability of L929 cells co-cultured with Me@Zn<sup>2+</sup> detected by the CCK-8 assay.

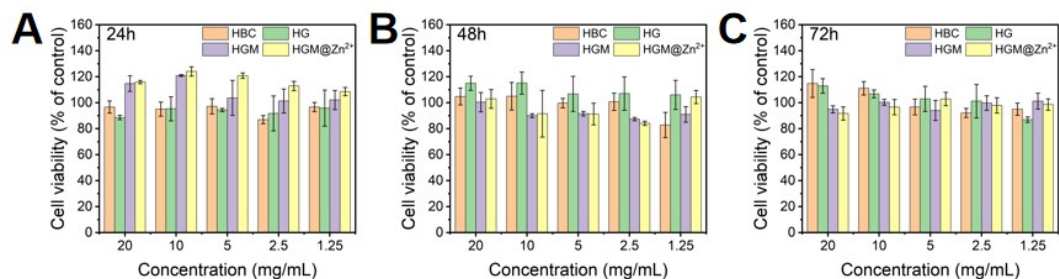

Fig. S6. Cell viability of L929 cells co-cultured with different material extracts for 24 (A), 48 (B), and 72 (C) hours was determined using the CCK-8 assay.

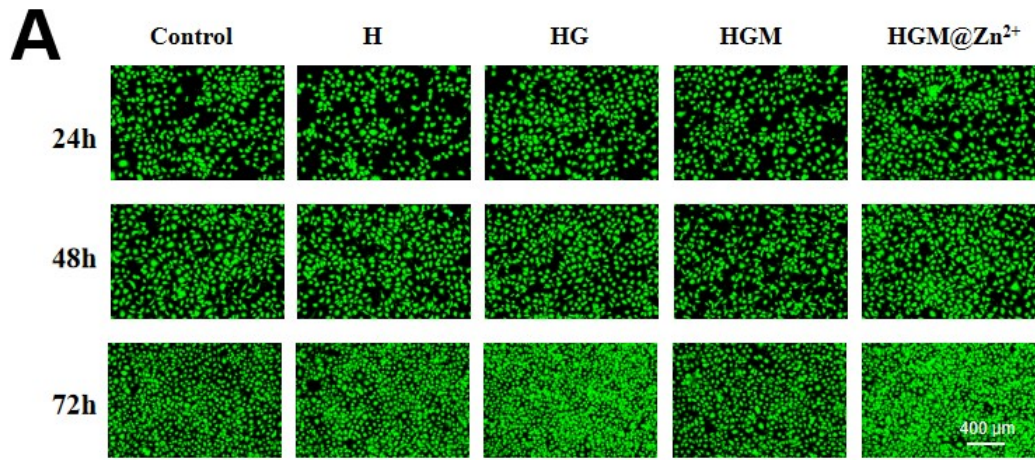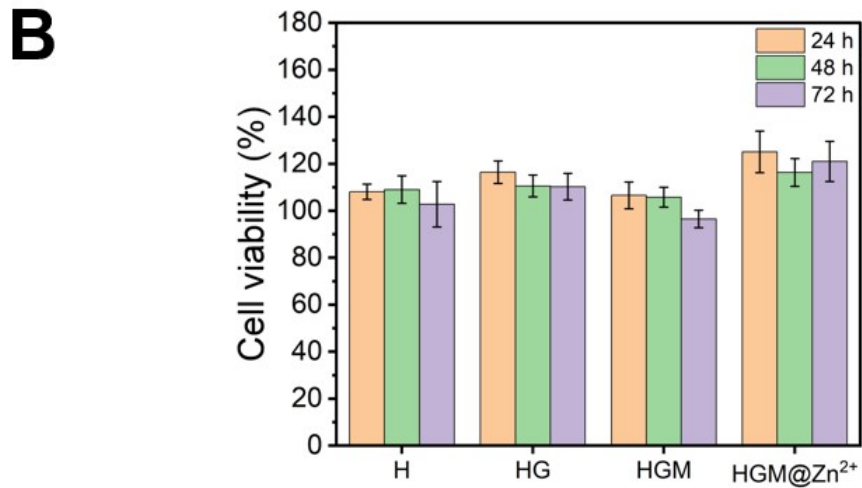

Fig. S7. (A) Live/dead staining of HUVEC cells co-cultured with different materials. (B) Cell viability detected by the CCK-8 assay.

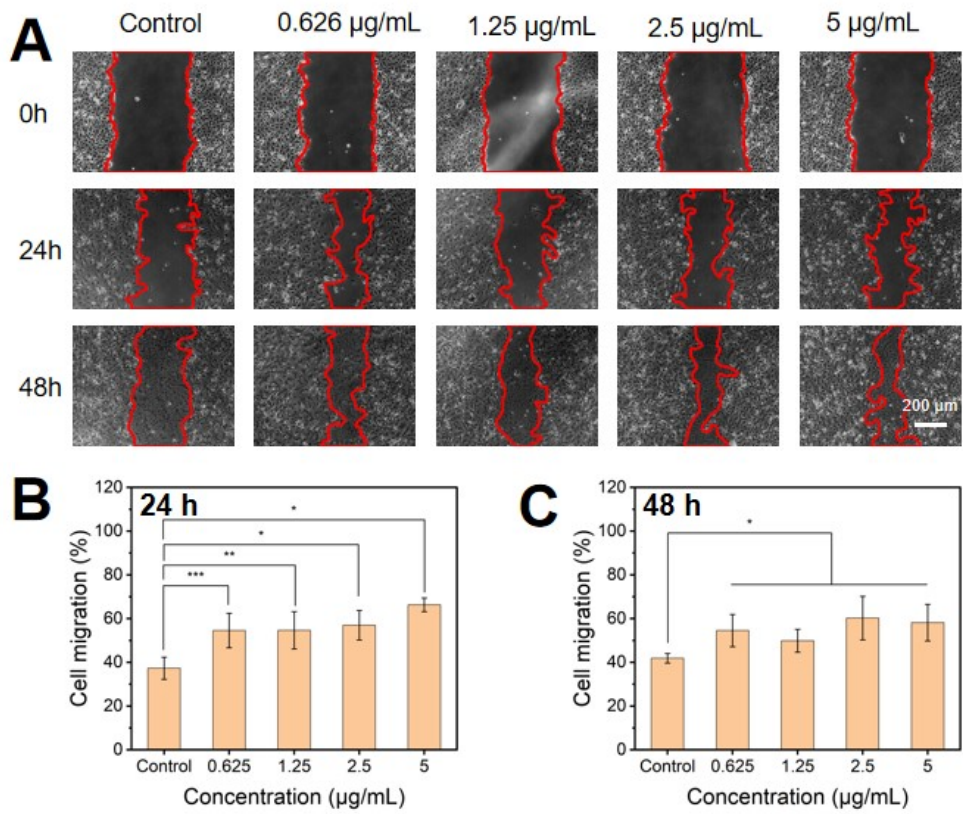

Fig. S8. Migration images of HUVEC cells treated with different concentrations of Zn<sup>2+</sup>. (B) Cell migration rate after 24 hours. (C) Cell migration rate after 48 hours

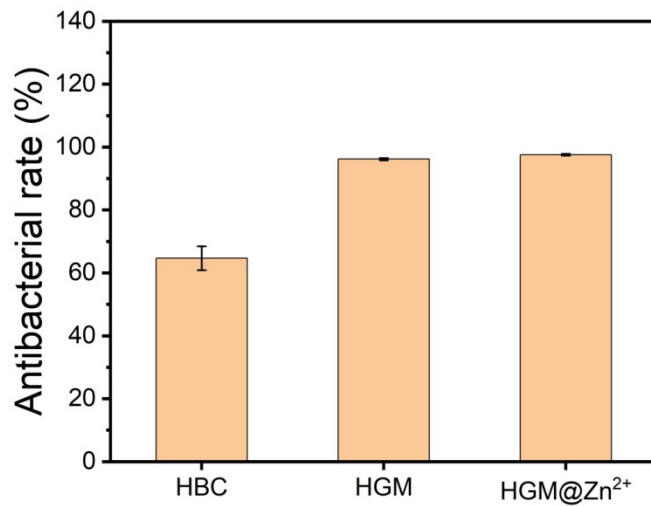

Fig. S9. The Antibacterial rate of different hydrogel wound dressings on infected wound.
